# Supplementary material for: Preparation of single-handed helical carbonaceous nanotubes using 3-aminophenol-formaldehyde resin
Source: Royal Society of Chemistry journal article supplement (doi:10.1039/c5ra04437e), 2015-01-01
Supplement: c5ra04437e1.pdf [file c5ra04437e1.pdf]

## Supporting Information

### Preparation of single-handed helical carbonaceous nanotubes using 3-aminophenol-formaldehyde resin

Hao Chen, Yi Li, Xianhui Tang, Baozong Li, Chuanyong Zhang, Yonggang Yang\*

Jiangsu Key Laboratory of Advanced Functional Polymer Design and Application,  
Department of Polymer Science and Engineering, College of Chemistry, Chemical  
Engineering and Materials Science, Soochow University, Suzhou 215123, (P.R. China)

\*Corresponding author.

E-mail address: [ygyang@suda.edu.cn](mailto:ygyang@suda.edu.cn) (Y. Yang)

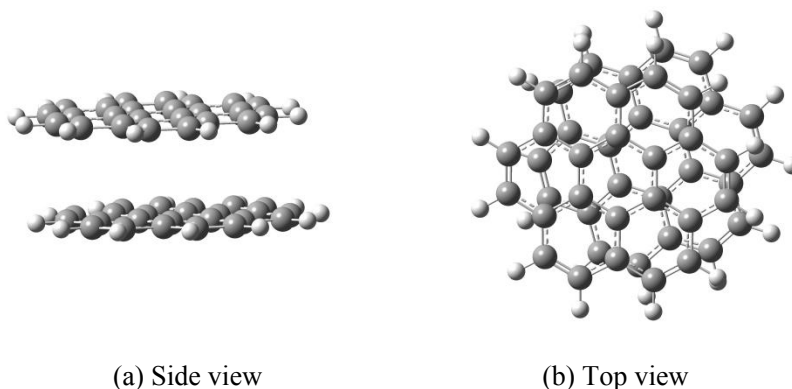

Fig. S1. The structure of the coronene dimer used to model the real system. (a) Side view, and (b) top view.

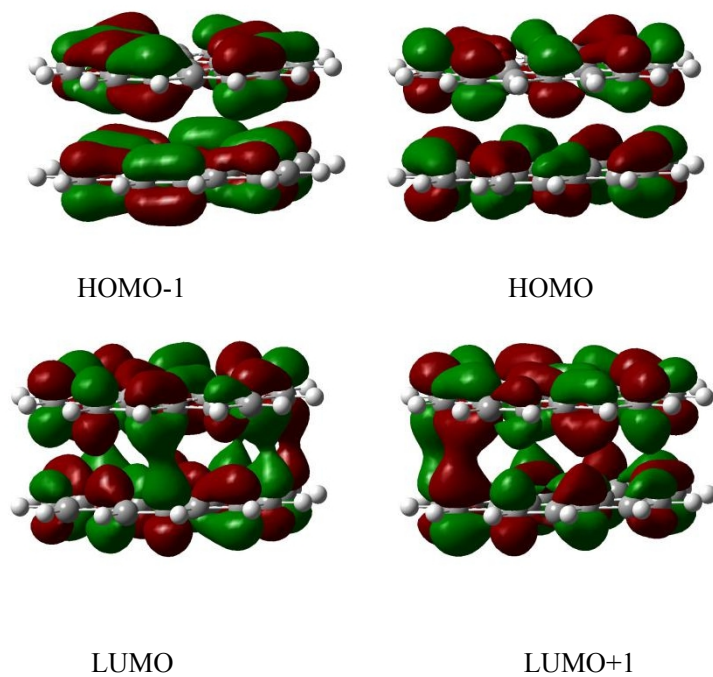

Fig. S2a. Side view of the two highest occupied molecular orbitals (HOMO) and the two lowest unoccupied molecular orbitals (LUMO).

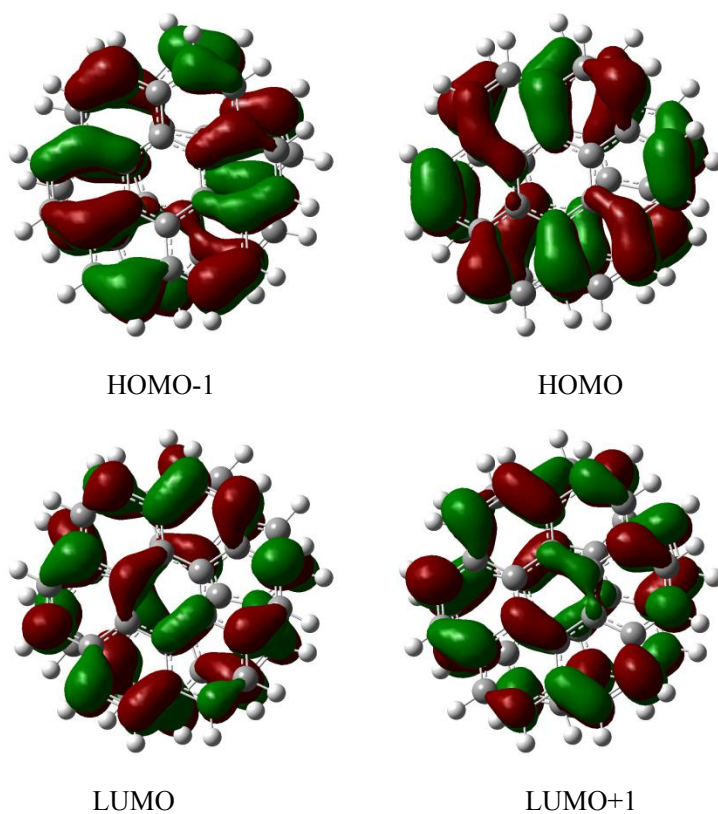

Fig. S2b. Top view of the two HOMO and the two LUMO.

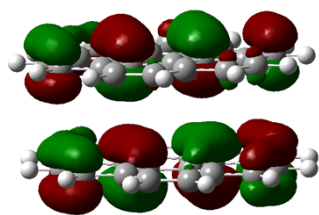

HOMO-4

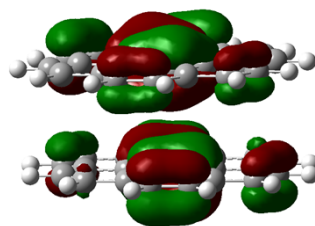

HOMO-5

Figure S2c. Side view of the two HOMO.

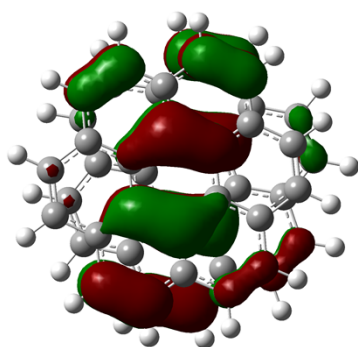

HOMO-4

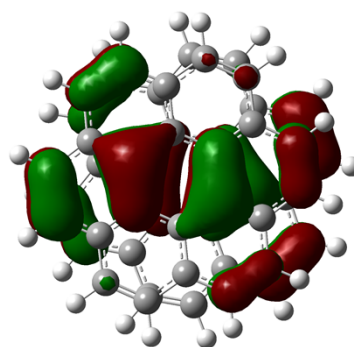

HOMO-5

Figure S2d. Top view of the two HOMO.

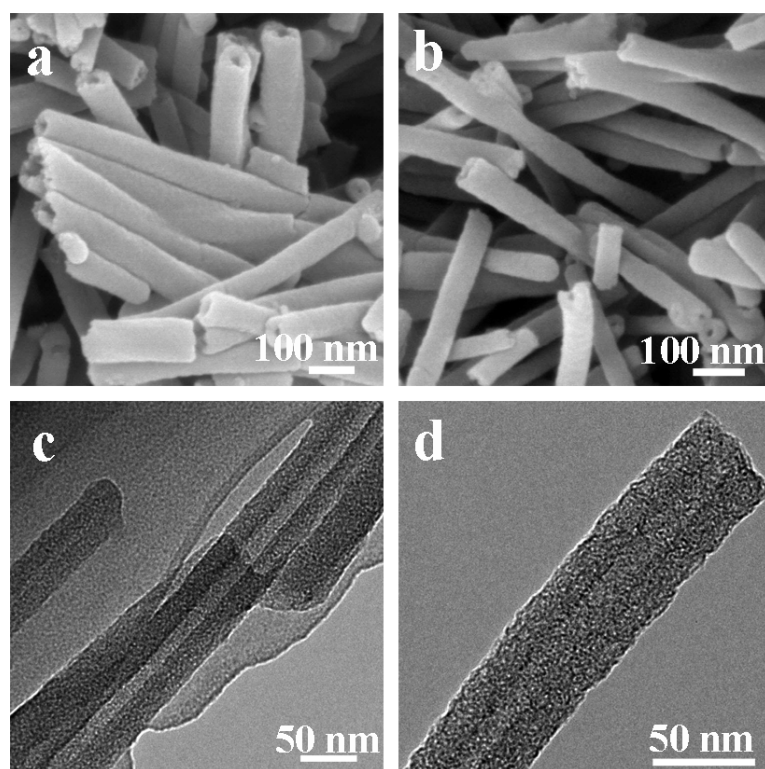

Fig. S3. FESEM (a), and TEM (c) images of LC-Phe-1400; FESEM (b), and TEM (d) images of DC-Phe-1400.

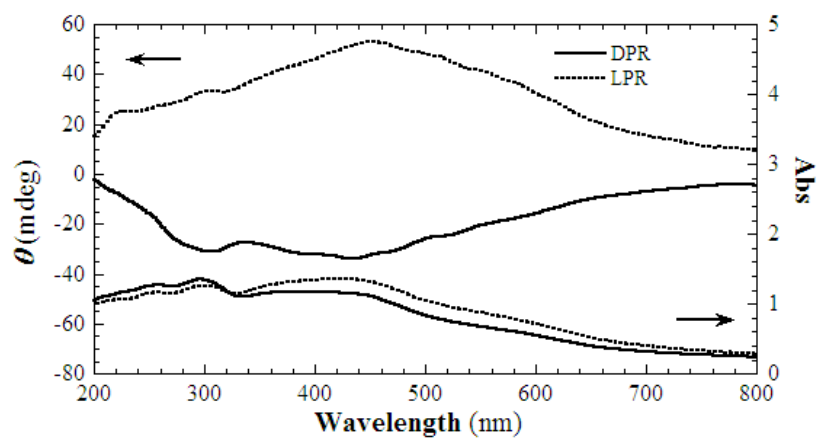

Fig. S4. DRCD and DRUV-vis spectra of the samples MPR and PPR.
